# Supplementary material for: Asymmetric Deactivation of HIV-1 gp41 following Fusion Inhibitor Binding
Source: PubMed Central journal article supplement (PMC2776349; doi:10.1371/journal.ppat.1000674), 2009-11-26
Supplement: ppat.1000674.s002.pdf [file ppat.1000674.s002.pdf]

**Table S2. Inhibitory and Binding Properties of C37 Variants.**

| C37 Variant Class               | Variant <sup>a</sup> | Mutation Position <sup>b</sup> | $K_D \pm \text{SEM}$ (nM) <sup>c</sup> | $k_{on} \pm \text{SEM}$ ( $\times 10^7 \text{ M}^{-1} \text{ s}^{-1}$ ) <sup>c</sup> | $k_{off} \pm \text{SEM}$ ( $\text{s}^{-1}$ ) <sup>d</sup> | $\tau_{off}$ (min) <sup>e</sup> | $\text{IC}_{50} \pm \text{SEM}$ (nM) <sup>f</sup> |
|---------------------------------|----------------------|--------------------------------|----------------------------------------|--------------------------------------------------------------------------------------|-----------------------------------------------------------|---------------------------------|---------------------------------------------------|
| WT ■ <sup>g</sup>               | WT                   | -                              | 0.00065±0.000063                       | 3.3±0.43                                                                             | 0.000021±0.0000035                                        | 780                             | 1.25±0.14                                         |
| Ala<br>■                        | W628A                | A                              | 0.033±0.004                            | 1.5±0.021                                                                            | 0.0005±0.000095                                           | 33                              | 16±2.2                                            |
|                                 | W631A                | D                              | 1.7±0.56                               | 1.3±0.1                                                                              | 0.022±0.0075                                              | 0.75                            | 110±9.7                                           |
|                                 | I635A                | A                              | 0.0066±0.0005                          | 2.1±0.3                                                                              | 0.00014±0.000023                                          | 120                             | 5.7±1.6                                           |
|                                 | Y638A                | D                              | 0.001                                  | 2.5                                                                                  | 0.000025                                                  | 670                             | 2.5±0.33                                          |
|                                 | I642A                | A                              | 0.0036±0.001                           | 1.9±0.12                                                                             | 0.000068±0.00002                                          | 250                             | 7.0±1.5                                           |
|                                 | L645A                | D                              | 0.013±0.0057                           | 2.4±0.1                                                                              | 0.00031±0.00014                                           | 54                              | 3.9±0.7                                           |
|                                 | S649A                | A                              | 0.00071±0.00003                        | 2.5±0.39                                                                             | 0.000018±0.0000028                                        | 930                             | 1.6±0.41                                          |
|                                 | Q652A                | D                              | 0.0029±0.0003                          | 3.4±0.42                                                                             | 0.000096±0.000015                                         | 170                             | 3.5±0.81                                          |
|                                 | N656A                | A                              | 0.0045±0.0009                          | 1.5±0.17                                                                             | 0.000069±0.000016                                         | 240                             | 30±4.2                                            |
| E659A                           | D                    | 0.00063                        | 3.6±0.3                                | 0.000023                                                                             | 720                                                       | 1.2±0.13                        |                                                   |
| Asp<br>■                        | W628D                | A                              | 0.027±0.0067                           | 1.3±0.053                                                                            | 0.00033±0.000086                                          | 50                              | 7.6±1.0                                           |
|                                 | W631D                | D                              | 2.7±0.53                               | 1.0±0.11                                                                             | 0.028±0.0062                                              | 0.60                            | 550±65                                            |
|                                 | I635D                | A                              | 14±2.4                                 | 2.5±0.15                                                                             | 0.34±0.062                                                | 0.049                           | 3100±350                                          |
|                                 | Y638D                | D                              | 0.20±0.015                             | 0.42±0.032                                                                           | 0.00083±0.000091                                          | 20                              | 39±0.92                                           |
|                                 | I642D                | A                              | 62±1.7                                 | -                                                                                    | -                                                         | -                               | 13000±2100                                        |
|                                 | L645D                | D                              | 3.2±0.65                               | 1.4±0.083                                                                            | 0.045±0.0094                                              | 0.37                            | 630±120                                           |
|                                 | S649D                | A                              | 3.8±0.58                               | 1.8±0.3                                                                              | 0.067±0.015                                               | 0.24                            | 2300±170                                          |
|                                 | Q652D                | D                              | 0.027±0.0059                           | 1.6±0.19                                                                             | 0.00043±0.00011                                           | 39                              | 53±0.98                                           |
|                                 | N656D                | A                              | 2.5±0.75                               | 2.6±0.058                                                                            | 0.065±0.020                                               | 0.26                            | 100±8.9                                           |
| Asp+Ala<br>■                    | W628D/I635A          | A/A                            | 1.0±0.14                               | 0.47±0.042                                                                           | 0.0048±0.00077                                            | 3.5                             | 97 ±8.4                                           |
|                                 | W628D/I642A          | A/A                            | 0.30±0.053                             | 0.49±0.035                                                                           | 0.0015±0.00028                                            | 11                              | 65±9.8                                            |
|                                 | W631D/I642A          | D/A                            | 321±50                                 | 0.10±0.022                                                                           | 0.32±0.086                                                | 0.052                           | 15000±2700                                        |
| Kinetically Restricted Variants | N637K (KYT)          | C                              | 0.00013±0.000036                       | 2.3±0.016                                                                            | 0.000003±0.000021                                         | 5600                            | 1.65±0.05                                         |
|                                 | T639I (NYI)          | E                              | 0.000080±0.000018                      | 2.3±0.016                                                                            | 0.0000018±0.000013                                        | 9300                            | 1.7±0.1                                           |
|                                 | N637K/T639I (KYI)    | C/E                            | 0.000062±0.000016                      | 2.4±0.1                                                                              | 0.0000015±0.000062                                        | 11000                           | 0.96±0.1                                          |
|                                 | di-C37               | -                              | -                                      | -                                                                                    | -                                                         | -                               | 0.7±0.26                                          |

<sup>a</sup>Residue numbering according to Env<sub>HXB2</sub> sequence.

<sup>b</sup>Residue position in helical wheel diagram according to Chan, et al (1997) Cell 89: 263-73.

<sup>c</sup>Solution phase interaction parameters determined using KinExA 3000 binding assay (mean ± SEM of three or more independent experiments).

<sup>d</sup>Values for  $k_{off}$  were calculated from  $K_D$  and  $k_{on}$  measurements ( $k_{off} = K_D k_{on}$ ) with errors formally propagated.

<sup>e</sup>The time constant for dissociation ( $\tau_{off}$ ) is the reciprocal of the  $k_{off}$  value.

<sup>f</sup>Inhibitory potencies determined in single-round HIV-1<sub>HXB2</sub> infectivity assays using HOS-CD4-CXCR4 target cells (mean ± SEM of three or more independent experiments).

<sup>g</sup>Symbols utilized in Figs. 1C, 1E and S2B.
