# Supplementary material for: Asymmetric Deactivation of HIV-1 gp41 following Fusion Inhibitor Binding
Source: PubMed Central journal article supplement (PMC2776349; doi:10.1371/journal.ppat.1000674), 2009-11-26

### 5-Helix Variants

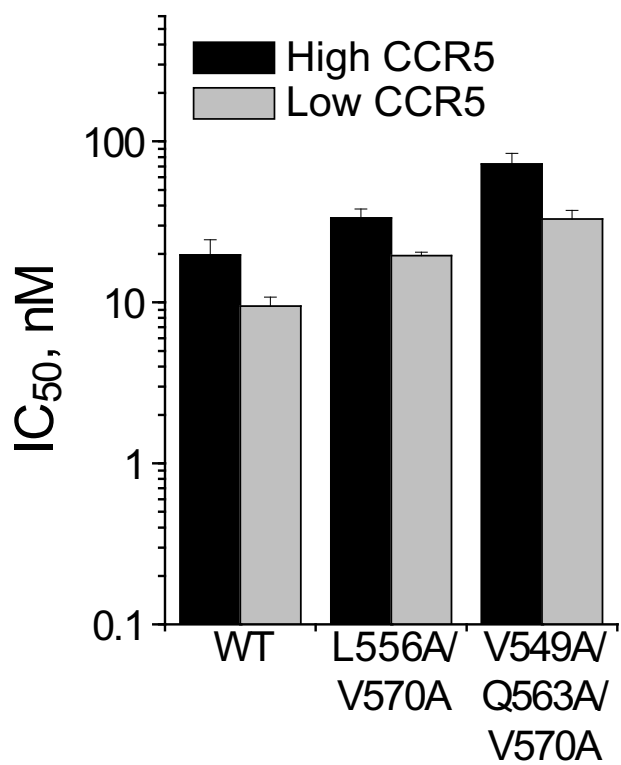

### C37 Variants

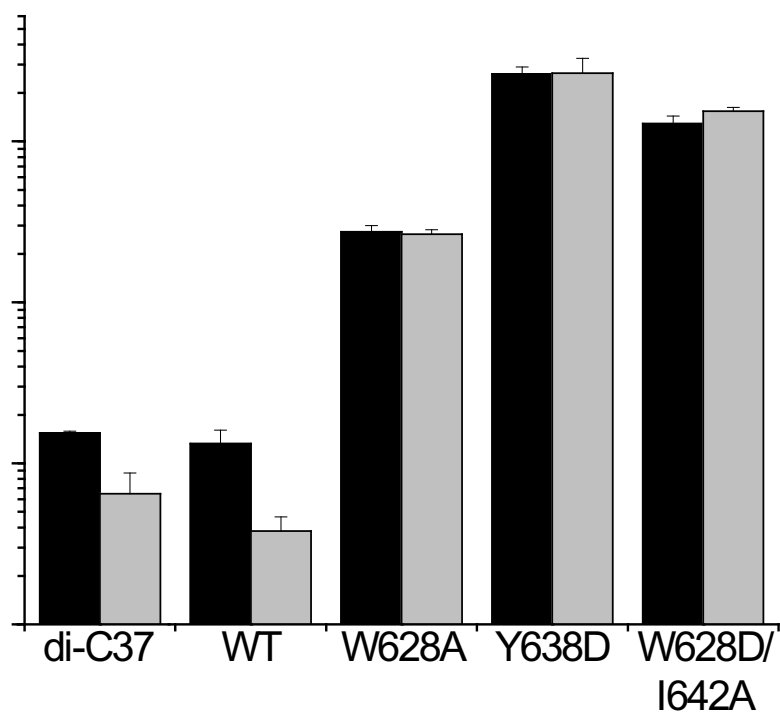

Supplement: ppat.1000674.s008.pdf [file ppat.1000674.s008.pdf]
