# Supplementary material for: Asymmetric Deactivation of HIV-1 gp41 following Fusion Inhibitor Binding
Source: PLoS Pathog. 2009 Nov 26;5(11):e1000674. doi: 10.1371/journal.ppat.1000674 (PMC2776349; doi:10.1371/journal.ppat.1000674)
Supplement: Table S1 — Inhibitory and binding properties of 5-Helix variants (0.09 MB PDF) [file ppat.1000674.s001.pdf]

**Table S1. Inhibitory and Binding Properties of 5-Helix Variants.**

| 5-Helix Variant Class | Variant <sup>a</sup> | 3x or N3 <sup>b</sup> | K <sub>D</sub> ± SEM (nM) <sup>c</sup> | k <sub>on</sub> ± SEM (x10 <sup>7</sup> M <sup>-1</sup> s <sup>-1</sup> ) <sup>c</sup> | k <sub>off</sub> ± SEM (s <sup>-1</sup> ) <sup>d</sup> | τ <sub>off</sub> (s) <sup>e</sup> | IC <sub>50</sub> ± SEM (nM) <sup>f</sup> |
|-----------------------|----------------------|-----------------------|----------------------------------------|----------------------------------------------------------------------------------------|--------------------------------------------------------|-----------------------------------|------------------------------------------|
| WT ■ <sup>g</sup>     | WT                   | N/A                   | 0.00065±0.0002                         | 3.3±0.43                                                                               | 0.000021±0.0000035                                     | 47000                             | 11±1.2                                   |
| Single Asp<br>■       | Q563D                | 3x                    | 0.049±0.0061                           | 1.0±0.1                                                                                | 0.0005±0.000092                                        | 2000                              | 38±3                                     |
|                       | V570D                | 3x                    | 2.3±0.39                               | 0.35±0.07                                                                              | 0.0081±0.002                                           | 120                               | 90±9                                     |
| Double Ala ■          | L556A/V570A          | 3x                    | 8.3±0.95                               | 1.2±0.22                                                                               | 0.083±0.021                                            | 12                                | 17±2.4                                   |
| Ala+Asp<br>■          | V549D/L556A          | N3                    | 40±7.3                                 | 0.028±0.005                                                                            | 0.011±0.0029                                           | 91                                | 2400±62                                  |
|                       | L556A/Q563D          | N3                    | 14±4.4                                 | 1.1±0.22                                                                               | 0.15±0.057                                             | 6.7                               | 44±6.9                                   |
|                       | L556A/V570D          | N3                    | 74±14                                  | 0.033±0.002                                                                            | 0.024±0.0049                                           | 42                                | 1600±420                                 |
| Double Asp<br>■       | V549D/Q563D          | N3                    | 25±4.5                                 | 0.21±0.04                                                                              | 0.053±0.014                                            | 19                                | 140±37                                   |
|                       | L556D/Q563D          | N3                    | 250±73                                 | 0.043±0.001                                                                            | 0.11±0.031                                             | 9.1                               | 860±150                                  |
|                       | Q563D/V570D          | N3                    | 8±0.84                                 | 0.13±0.01                                                                              | 0.01±0.0015                                            | 100                               | 380±53                                   |
| Triple Ala<br>■       | L556A/Q563A/V570A    | 3x                    | 29±4.5                                 | 2.6±0.5                                                                                | 0.75±0.12                                              | 1.3                               | 35±1                                     |
|                       | V549A/L556A/Q563A    | 3x                    | 35±1                                   | >2.0                                                                                   | >0.7                                                   | <1.4                              | 16±1                                     |
|                       | V549A/Q563A/V570A    | 3x                    | 9.2±0.55                               | 0.62±0.085                                                                             | 0.055±0.0084                                           | 18                                | 34±2                                     |

<sup>a</sup>Residue numbering according to Env<sub>HXB2</sub> sequence.

<sup>b</sup>Distinguishes whether substitutions were incorporated into all three N-HR segments (3x) or incorporated in the third N-HR segment only (N3). For details, see Steger and Root (2006) J Biol Chem 281: 25813-21.

<sup>c</sup>Solution phase interaction parameters determined using KinExA 3000 binding assay (mean ± SEM of three or more independent experiments).

<sup>d</sup>Values for k<sub>off</sub> were calculated from K<sub>D</sub> and k<sub>on</sub> measurements (k<sub>off</sub> = K<sub>D</sub>k<sub>on</sub>) with errors formally propagated.

<sup>e</sup>The dissociation time constant (τ<sub>off</sub>) is the reciprocal of the k<sub>off</sub> value.

<sup>f</sup>Inhibitory potencies determined in single-round HIV-1<sub>HXB2</sub> infectivity assays using HOS-CD4-CXCR4 target cells (mean ± SEM of three or more independent experiments).

<sup>g</sup>Symbols utilized in Figs. 1B, 1D and S2A.
